# Supplementary material for: Identification of Breast Cancer DNA Methylation Markers Optimized for Fine-Needle Aspiration Samples
Source: Oxford University Press journal article supplement (doi:10.1158/1055-9965.epi-13-0208), 2013-10-02
Supplement: 10559965epi130208-sup-supplementary_table_1.xlsx [file 10559965epi130208-sup-supplementary_table_1.xlsx]

## Sheet: Sheet1
Supplemental Table 1: Qualitative MSP Screen in Lymphocytes (LYMPH), Breast Cancer Cell Lines (CA), and Benign Breast Epithelial Cell Cultures (HME). Number of DNA preparations is designated by (N) in the header and the number positive is shown in the table. Two cell sources were mixed for each DNA preparation to improve screening efficiency. Breast cancer cell lines inlcuded: HCC38 (TNBC), ZR75-…
Symbol	Entrez_ID	ACCESSION	Multiple Primers	LYMPH (2)	CA (5)	HME (3)	CLASS	Ann Temp	Seq M For	Seq M Rev
ABCA1	19	NM_005502	NO	0	3	0	CANCER	62	GTTTGTTCGACGGTGGAGATCG	CAAAACAACGCTCGATACCGAA
ABCC3	8714	NM_020038	NO	0	1	0	CANCER	62	GTTCGGTAGGGCGGGTTCG	CCAACGACGAACAAAACGAACG
ACOT4	122970	NM_152331	NO	0	1	0	CANCER	62	GGTAGTTTTCGGTATTAGGGGACGTC	AAAAATTCAAAAATCGAAACCCGAA
ACTA1	58	NM_001100	NO	2	5	2	GENERAL	60	AAACAAACGACCACCGCAACG	TGGGCGGGTAGTTATAATTGTTATTTTCG
ADM	133	NM_001124	NO	0	2	0	CANCER	57	ATATCGTTCGGTTGGATGTC	CTAAACCTTCGAAACCAACG
AFAP1L2	84632	NM_032550	NO	1	2	0	LYMPH_CANCER	62	TTTTCGACGTTTTCGGAGTTAAGAC	CCGCCGAAACTAACAATCGAC
AKR1B1	231	NM_001628	NO	0	2	0	CANCER	62	CGAAAACCCCCGCCCTACCG	TTTGTTTGCGTTCGAGGTTTATCG
ALDH1A3	220	NM_000693	NO	0	4	2	EPI	57	GTTTTTTAGAAATCGTATTTTTCGC	GACTTCGAAACTCACAACGC
ARTN_L	9048	NM_057091	YES	0	4	0	CANCER	55	TTTTCGTGTTTTTTTATCGTTC	TACTCCACCCGTCGAATC
ARTN_S	9048	NM_057091	YES	2	5	1	GENERAL	62	CTAAACCACCGCTCCGACGAA	TCGGTAGTAGGGTTGGTTGACG
ATF3	467	NM_001040619	NO	0	0	0	NONE	60	CGGTAGGATCGTGAAGGTAATTTCG	TCTTCCGCCCCGAAACAACG
BIK	638	NM_001197	NO	0	0	0	NONE	62	TAGTGCGGTTTTCGGGTATTCG	TTCCTCAAATACGCAACGCCTCC
BIRC3	330	NM_182962	NO	0	1	1	EPI	57	AAAGATAGCGTGAGATTCGC	TACTACCCAAAAACCGACGA
BTG1	694	NM_001731	NO	0	0	0	NONE	62	TCGTGGTATTATAAAGGGTGTTGTACG	ACGACCTAATCACATCGCTCGAA
C11orf96	387763	NM_001145033	NO	0	2	0	CANCER	62	GTTTTTCGGAGTCGGTTGGC	ACGAATACCATTTAAAACGTACGCG
C15orf48	84419	NM_032413	NO	0	1	0	CANCER	62	CGGGAGTCGCGTGTTTAACG	CACCTAAACGCCGAACGATACG
C19orf33	64073	NM_033520	NO	2	5	3	GENERAL	57	TTGTGGGAGCGAGTTAGAATAC	CCCTACCTTCCTACGTACCG
C1orf106	55765	NM_018265	NO	2	2	0	LYMPH_CANCER	62	AACAACCTCGCCCCTCGAAC	GGATTGAAGAGTTCGATTTAAGAGTCG
C1QTNF1	114897	NM_198593	NO	0	2	0	CANCER	57	GTAGAGATTTCGGAGATCGC	AAAAATCTTCCGAAAAACGA
C2orf55	343990	NM_207362	NO	0	0	0	NONE	62	TTTCGAGGTTTCGGTTTTATTTCGT	AACTCCCAACTACAAACGCGC
C7orf57	136288	XM_059832	NO	0	5	0	CANCER	57	GCGTCGCGGGTAGTATTTACGG	ATAAACAAAACCCGAAACCACAATAAACG
CABYR	26256	NM_153770	NO	0	0	0	NONE	62	TAATACACGCCCCGATACCTACG	TTTGAGATATAATGGTTTTCGAGGTCGT
CALML5	51806	NM_017422	NO	2	5	3	GENERAL	62	CGTTGTCGTAGGAGGAGTTGGAC	GCAACCAAAAAAACACAAACGAA
CAMK2N1	55450	NM_018584	NO	0	0	0	NONE	62	GGGGTAGGAAGTTAGCGGTAGTTC	CGAAAAAAAATACCGACCGC
CAV1	857	NM_001753	NO	0	0	0	NONE	57	TCGTTGCGGGCGTTTTTCG	CTACTCGCGATTAACCCGAACG
CCNA1	8900	NM_003914	NO	0	3	0	CANCER	60	GATGGAGACGTAATATTGTCGC	GCTTCCTACCGAAAAACGAC
CCNDBP1	23582	NM_012142	NO	0	3	0	CANCER	62	GTTGACGGAAACGAGTTTTTGACG	CCGCAAACACAAACCTCCGCT
CD14	929	NM_001040021	NO	0	4	0	CANCER	62	TAAACGATAAAAATTTCCGCTACGTC	AGAGTTTTGATCGTGTTAGTATATTGTCG
CD55	1604	NM_000574	NO	0	0	0	NONE	62	GGTGACGTAGAGTTTTAGTTTAGATTTCG	CGCGCCGAATTAAAACAAAAACG
CDC14b	8555	NM_033331	NO	0	1	0	CANCER	62	TAGAAAGGTTTCGTTTTCGTGACGT	CCCAAAAAAACTATTCCGTAACGCT
CDC2L2	985	NM_033528	NO	0	0	0	NONE	62	CGGGGGCGAGCGATATTTTCG	CGCACACTTAAAATTCAACCTAACAAACG
CDH1	999	NM_004360	NO	0	0	0	NONE	57	TTTAGTTCGGTTCGATTCGA	AACAACAACGCCGAAAAACTACG
CDH2	1000	NM_001792	NO	1	1	0	LYMPH_CANCER	62	TTTTATCGGTTAAGGTTTTCGTCGTTG	AAACGACTACTATAACAACGCAAACG
CDKn1a	1026	NM_078467	NO	0	0	0	NONE	62	CGCGTTCGGTTTGCGTATAC	GAAATCTCCGACACATCCCGA
CITED2	10370	NM_006079	NO	0	0	0	NONE	62	GGGTCGGGAAGAAATTAGAGTCG	CGCGACACGTACTACAAAAACTACG
CKB	1152	NM_001823	NO	0	3	0	CANCER	62	TAAATAGTCGTTAATGGGCGGTTC	GAAACGACGCAAACGAACA
CLDN1	9076	NM_021101	NO	0	2	0	CANCER	62	CGGGTTGTTTATTTGTAAATTTTTCGT	GCGTTAACCATAACTCGCTCGAA
CNFN	84518	NM_032488	NO	2	5	3	GENERAL	62	TTGTTAGAGTTTCGTTTAGGGTTGC	ATATTCCTACCTACAAAATCGCGAT
CNN3	1266	NM_001839	NO	0	1	0	CANCER	62	CGCGGTTTTTTAATTGGTCGTATC	CCTCCGCCTAAACCTTCGAA
CNTD2	79935	NM_024877	NO	2	4	2	GENERAL	62	TCGAGAGGATAGAGTTAGTTTGCGG	CTTTAAAAACCCCTAAACGCGTACG
COL16A1	1307	NM_001856	NO	2	5	1	GENERAL	62	CGGTAGTTTTCGGTAGGCGT	TCTATCTCTCCGTAACGATCACGAA
COL7A1	1294	NM_000094	NO	2	5	0	LYMPH_CANCER	60	GGTTTTCGTTTGTCGTTTCGTTTTTCG	CCAACCCGAATCCTAATCTTACCTACG
COL9A2	1298	NM_001852	NO	1	5	1	GENERAL	62	TTTCGTTGTTAGGGTTTAGGGTGC	CGCTATCCTCAAATAACCTCTCGAA
CPNE8	144402	NM_153634	NO	0	5	1	EPI	62	TGTTCGTGTTTTGTAGGTGAGGAC	AACTTCTTACCTACGCAAAACCTCG
CRABP2	1382	NM_001878	NO	0	0	0	NONE	62	AGGAGTTTACGGGGATCGTTTTTC	AACAATTCCTCGAAATTTTCCGATC
CRIP1 _CML	1396	NM_001311	YES	0	5	0	CANCER	62	TTGGGGATCGTTTAGGAGGATCG	AAATCGCCAAAACCCTCGAACG
CRIP1_DB	1396	NM_001311	YES	0	5	0	CANCER	57	AATTGGATTCGGGAGATATTATAGC	CTAAAAAAACGCAACTCTTTAAACG
CST6	1474	NM_001323	NO	1	5	0	LYMPH_CANCER	62	TTGAGGGTTTCGACGGTATTGAC	ACAACGCCAAAAAACAAAATACGAC
CTH	1491	NM_153742	NO	0	0	0	NONE	62	TAATCGTTGTGTGTCGTTTTAGTGC	ATAACCAATCGAAACCGAATATCCG
CTHRC1	115908	NM_138455	NO	1	1	1	GENERAL	62	GGGAGTTATGCGATTTTAGGGTTTC	ACCTCCCTCTACCGAAACTACGC
CTSL2	1515	NM_001333	NO	0	0	0	NONE	62	GGTCGTTTGGAAATTTAAATTTCGA	CTATCCCTCGATCTAATCGAAAACG
CXCL1	2919	NM_001511	NO	2	2	0	LYMPH_CANCER	57	CGGGTCGTAGGTATTTTTTC	GAACCATAAAACTCAACAAACG
CXCL14	9547	NM_004887	NO	0	3	0	CANCER	62	CGCAAAACGCAACGCACGAC	GTTCGGAGACGTTATTTAGTTTTGTTCG
CXCL16	58191	NM_022059	NO	0	0	0	NONE	62	GAGGGTCGGTTCGGTAGTGTAGTC	CGAAAAACCGATTCGATTCGAT
CXCL2	2920	NM_002089	NO	0	0	0	NONE	62	GGAATTTTTTTGGTTCGGGATTTC	CAACAAACGATTCGAACGACTATACG
CYB5R2	51700	NM_016229	NO	0	4	0	CANCER	59	TTTGTTTTTTCGGGCGTGC	TCGAACTAAAATTAACCGAAAACCG
CYGB	114757	NM_134268	NO	2	5	0	LYMPH_CANCER	57	TTCGCGTTTTATTTTTCGTTC	ACCCGACTTTACTCGACGAC
CYP24A1_1	1591	NM_000782	YES	0	0	0	NONE	62	GTAAGCGTCGGGCGGTAATTAC	CCAAAAAATCATACGAAACCCGAA
CYP24A1_2	1591	NM_000782	YES	0	5	0	CANCER	59	TTAGTAAGAGTCGTTCGTTTGTCGT	TATACGCCGTAAATATCACCAATCTCG
DDIT3	1649	NM_004083	NO	0	0	0	NONE	62	ATTTTTTAGCGAGAGGGAGCGAC	CTACCAATCAAAAAATAACACGCCG
DDX43	55510	NM_018665	NO	2	5	3	GENERAL	62	GTTTCGTGCGGGTTTTTTAAGTAGC	GTCCAACTCTACACCACCTAACCGTA
DDX60	55601	NM_017631	NO	0	0	0	NONE	62	GAGAGGAGAAAGGAAATCGAAATTTTC	CAAACCTAACCTAAAACTCGACGCT
DHRS2	10202	NM_182908	NO	2	5	3	GENERAL	62	TTGTTGTTGTTTATTCGTTGGGTTC	TTATTCATTCCTCTCGATACATTCGTA
DHRS3_1	9249	NM_004753	YES	0	0	0	NONE	62	GTCGCGTAGATTAAGGCGTTC	CAAAAACTAAAAATTACCGCTCGAT
DHRS3_2	9249	NM_004753	YES	0	0	0	NONE	62	GGAGTTTCGTTTTTTGTTCGGTTTC	GATAATAAAAACGTTCTCCCGCGAC
DLK2_1	65989	NM_206539	YES	2	5	1	GENERAL	55	GTGTTAGGTGTGCGTCGTGC	GAACGACGACAACGACTACTCCTC
DLK2_2	65989	NM_023932	YES	0	0	0	NONE	62	CGCGAGGAGTAGTCGTTGTC	ATACGAACCGAACGCTCGAA
DNAJA4	55466	NM_018602	NO	2	4	0	LYMPH_CANCER	62	TTAAGTCGTTTTTTTCGGTTTTCGT	GAACGTCTACTCCTTTAACTACCCGTC
DNAJB2	3300	NM_006736	NO	0	0	0	NONE	62	AGGTTTTAGTTGGGGTTGACGTC	CGACTACTACGTAAAACGCGCC
DSE_L	29940	NM_013352	YES	1	0	0	LYMPH	62	GAGGTCGAATTGGGAGTTAATCGTC	AAAATCTCCAATCCTAACGACACCG
DSE_S	29940	NM_013352	YES	1	0	0	LYMPH	62	TTTGACGCGTGAAGTTTGAGTTAC	CATCGTATTCCCGACTCGATACTC
DUSP1	1843	NM_004417	NO	0	0	0	NONE	62	TTTTTGGTTCGGCGTAGAGAGATTC	CCCAACGTAATCGACCCTACGAT
DUSP10	11221	NM_007207	NO	0	0	0	NONE	62	TATTGGTTTAATTCGTCGTCGGTC	CGCTCCTCTTCAACTATAAACTCGC
DUSP5	1847	NM_004419	NO	0	0	0	NONE	62	GATATTTTGGTCGTGGGTATTCGC	GCCTCCTTACGAAACATCTTACGC
EEF1A2	1917	NM_001958	NO	0	0	0	NONE	59	TTTTTTTGGTTGAGATTTCGGTTTC	ACCCCGAAAATCCCTCTTCG
EGFLAM	133584	NM_152403	NO	1	1	0	LYMPH_CANCER	62	GATTTGGTGAAATTTTGTAGGCGTC	TTACCTAATTTTCGAATAACCGCTCG
ENG	2022	NM_000118	NO	2	3	0	LYMPH_CANCER	62	TTTAGAAGGTTGGAGTAGGGACGTC	ATCCAATAACAAAACTACGAACGAA
EPAS1	2034	NM_001430	NO	0	0	0	NONE	62	AGTTTTTAAAGTGGGTTGTCGGTC	AAACACTACCGAAAATTATACGACCG
EREG	2069	NM_001432	NO	2	5	0	LYMPH_CANCER	60	GTTCGTGTATTTTTCGTAGTCGTTTTTCG	AAACAACAACGCAAAAACCCTACCG
ESD	2098	NM_001984	NO	2	0	0	LYMPH	62	GTTTGGACGTTGTTAGTTTTTTTGC	CCAAAATCGCCGTCTCTACG
FAM107B	83641	NM_031453	NO	2	5	3	GENERAL	62	TAACAATACGAATCGAAATTCAAATCACC	TTATAGTTCGTTTTATTATTTAGGGATTCGG
FAM43A	131583	NM_153690	NO	0	1	0	CANCER	62	GGTTCGCGTCGGTTTATATTTATTC	AACTCTCCACGATCTACTACCCGC
FBLN2	2199	NM_001004019	NO	0	4	0	CANCER	62	GGTTTTTAGGAGTCGGGTTAGCG	CGCCTCCGAAACGAAATCTCG
FBXO2	26232	NM_012168	NO	0	5	0	CANCER	62	TTCGGTCGTCGCGGTACG	CGAAAACGAAACCTAACGAACCG
FBXO32	114907	NM_058229	NO	0	0	0	NONE	59	GTTCGGTAGTATCGTTTTAAGTTTTTATCG	TATTTATAAACTCGACTTATTTTCCGAAACG
FBXO6	26270	NM_018438	NO	0	0	0	NONE	62	TTGGGGATTTTAGGTTCGTTTTTTC	GACTTCGTTATCGCTAAACCCCG
FHL2	2274	NM_201555	NO	0	0	0	NONE	62	TTTGGTAAATAAAGGGTACGGGTC	ACCATATAAAAAAATACACGCCTCG
FLJ40504	284085	NM_173624	NO	2	5	3	GENERAL	62	CCCTCAAATCCTCCGTTAAATAATATTCG	ATTAAGTCGTCGGTACGTAGCG
FLNC	2318	NM_001458	NO	0	4	0	CANCER	62	CGCAACGCAACGAATCCCGT	GGTATTTCGTTTGTTTTATCGTTTAGGTCGA
FOSB	2354	NM_006732	NO	0	0	0	NONE	62	CGTTATAGGAATTTCGGGAAGGC	CGATCTAATCACTTACATAACCCTCGAA
FOSL1	8061	NM_005438	NO	0	2	0	CANCER	55	CCGAAAACGACGACGAATACGA	TTTTCGTTTTAGTTTTTAGTTCGGTTTCG
FOXD1	2297	NM_004472	NO	0	0	0	NONE	62	TTGGATTTAGTTTTGGTTTCGTCGA	TCTCGAAACAACTTTTACCCCGTC
FSCN1	6624	NM_003088	NO	0	0	0	NONE	62	TTGGTGGCGTTGACGTTATTTC	GACGCCCCTACTCCTTTATTCGA
FTL	2512	NM_000146	NO	0	0	0	NONE	62	GGGTCGGCGTATTATAAAAGAAGTC	AAAAAAATCCCCGAATCTATTCCGT
FXYD5	53827	NM_014164	NO	0	2	1	EPI	62	CGCGTTTTTTTGGTTATATTTTTCG	CCACCTAAACCCGACCCGTA
GABARAPL1	23710	NM_031412	NO	0	0	0	NONE	57	CGCGGGGTGACGTTATAGTTC	AAATAAAAAAATACCGACGACTTTTCG
GBP4	115361	NM_052941	NO	0	5	3	EPI	62	TGATAAAGGTAGTGGAGGAATTTCGC	CGCCTATAAACCGTCTAAAAACGCT
GDF15	9518	NM_004864	NO	2	2	2	GENERAL	62	ATGTTCGGGTAAGAATTTAGGACGG	GCCTCGACCAAAAACAAAACG
GEM	2669	NM_181702	NO	0	0	0	NONE	62	CGGCGGGTATAGCGTAGTATTTTTC	CCTTACTTAACTCGACCGAATCGAC
GLDC	2731	NM_000170	NO	2	5	3	GENERAL	62	TCGGGATAGTAGTAGTGGCGGC	TATACCTCCGAACGAAATCGTCGTA
GNE	10020	NM_005476	NO	0	2	0	CANCER	62	GTAGGTTCGCGTTTTGTTTGTTTC	AAATACTCTCCCGAAATCCCACG
GPRC5a	9052	NM_003979	NO	1	1	0	LYMPH_CANCER	62	TAATAATTGTTTAGAGTGCGAGGGC	CCCTAATACCAAAACGTTAACCGTA
GPX1	2876	NM_201397	NO	0	4	0	CANCER	62	TCGAGTTTTTCGGGTAGGGC	TAACTAACCGACGACGAATCACGTA
GRHL3_1	57822	NM_021180	YES	2	5	1	GENERAL	62	AGCGTTGATTTCGTATTTGATATTGTGTC	CCGATTAAAATCCCAATACTTCCGT
GRHL3_2	57822	NM_021180	YES	2	5	1	GENERAL	62	CGGTGGATATTTGTCGTTTTTAGAGC	CCTTAACACGCCAAAATAAAATCGTC
GSTP1	2950	NM_000852	NO	0	5	0	CANCER	62	CGTCGTGATTTAGTATTGGGGC	ATAACGAAAACTACGACGACGAA
HBA2	3040	NM_000517	NO	0	2	0	CANCER	62	GGGTGTACGAGTCGATAGCGTTC	ACTCGACCTCCCCTAAAAATACACG
HCP5	10866	NM_006674	NO	0	0	0	NONE	62	TGGTTTTAAAGTTTTCGTCGGTTTATC	CTAAATCAAAACCACGACTCCCG
HERC5	51191	NM_016323	NO	0	0	0	NONE	62	TTAGTAGTTGAGGTTGCGGTTTTTC	CGCCCACTACCTCAAACGTTAC
HES2	54626	NM_019089	NO	0	2	0	CANCER	57	GAGTTGCGTAAGGTGGGTATC	ACAACGACTTCAAACTCTACGAAC
HIST1H1C	3006	NM_005319	NO	0	0	0	NONE	62	TTTAGAGTTTGTTAGTTAGGCGGGC	ATAACAAAACGCCGATAAAACAACG
HIST1H2BC	8347	NM_003526	NO	2	5	0	LYMPH_CANCER	62	GATGGTAAGAAGCGTAAGCGTAGTC	CGAACGCTTATTATAATACGCCAAAC
HIST1H2BD	3017	NM_138720	NO	2	5	2	GENERAL	62	TGGGGATTATGAATTTTTTCGTTAAC	CTTAATACCCTCCGACACGACGTA
HIST1H3D	8351	NM_003530	NO	0	0	0	NONE	62	TTTTAAGAATTTAAAATGTTCGGACGC	CTTACGAAACAAACGATATACGCGA
HIST1H4H	8365	NM_003543	NO	1	0	2	LYMPH_HME	62	GACGTTATTTAGGGTTGGGTTATGC	ACGCCCTTATATACCGAAAATTCGA
HIST2H2AA3	8337	NM_003516	NO	2	5	2	GENERAL	60	TGGTAAGTAAGGAGGTAAGGTTCGC	ACTCGAAAACCGCAACCATATAAAC
HIST2H2AC	8338	NM_003517	NO	1	2	0	LYMPH_CANCER	60	TTTATTTTGTTGCGAGGTTTTGAGC	CTTTACGCAACAAACGATACACTCG
HIST2H2BE	8349	NM_003528	NO	2	5	0	LYMPH_CANCER	62	GACGGTAAGAAGCGTAAGCGTAGTC	CCTTAAACGAAATACCGATATCGAA
HLA-B	3106	NM_005514	NO	0	5	0	CANCER	62	TTATTTTAGTGGGTTACGTGGACGA	TATATTCCGATCCCAATACTCCGAC
HNRPH1	3187	NM_005520	NO	0	0	0	NONE	62	TTAAGCGTGTAATAATTCGTCGGC	ATCCCTTATACGAATTCTACGCACG
HOXB5	3215	NM_002147	NO	0	3	0	CANCER	59	TTTGAGGTTATTAGCGAGAATTTAC	TCGTTATAACCCTATACTTCACGA
HOXD1	3231	NM_024501	NO	2	4	2	GENERAL	62	CGTTATGGGTTGGAGAGGGTAGTTC	CCGCCGCTACTACTACATAACACGT
HSPA2	3306	NM_021979	NO	0	0	0	NONE	57	GGTCGCGTGTTTTGTTAATTC	GCGCCTCCTACTACTAACTAACGT
IFIH1	64135	NM_022168	NO	0	0	0	NONE	62	GCGTATATCGTAGAGTTTAAAGTGTCGC	CGCACCTAAACAAATAAACAAACGA
IGFBP3	3486	NM_001013398	NO	1	1	0	LYMPH_CANCER	59	TAGTCGTGCGGTATTTATATCGAGC	GTCCAACAACGCCTACAACGAT
ILDR1	286676	NM_175924	NO	1	3	0	LYMPH_CANCER	62	GTAGGGAAGGTGGTCGTAGTTTTTC	AAACGTCCGCTCTAATCCCG
IQCG_L	84223	NM_032263	YES	0	0	0	NONE	62	TTTTCGATTGGATAGCGTTATTCGT	ACAACATTTATTAACCGACTTCGCG
IQCG_S	84223	NM_032263	YES	0	0	0	NONE	59	GAAGGACGAGGTTTCGTCGC	TTTCCGAAAATTATTTTTCTAACGTT
IRAK2	3656	NM_001570	NO	0	1	0	CANCER	62	AGTGTTCGATTTAGTCGTTTCGC	CTCGCTAAACGCGTCCATATTAC
IRF1	3659	NM_002198	NO	0	0	0	NONE	59	TTTCGTTAAGTGTTTGGATTGTTCG	ATAACCTCGATTCGACGAAACTCG
IRF7_L	3665	NM_004029	YES	0	3	1	EPI	62	TTTAATAATAAGAATAGGCGGCGC	AATACCTAAATACCAAAACCGCCG
IRF7_S	3665	NM_004029	YES	0	4	1	EPI	62	TGCGAAGCGTTATTGTTTAGGTTTC	ACTACAAATATAACCGACGCGCAC
ISG15	9636	NM_005101	NO	2	3	2	GENERAL	60	GGTATGTTTCGGGAAAGGGAAATCG	CGACCCTATTATAAACCTAAAACACACACG
ITGA2	3673	NM_002203	NO	1	1	1	GENERAL	62	AGGGCGTTATTTTTATTTTTATCGT	GCGAACTACACCTCGACTCGTC
ITGA5	3678	NM_002205	NO	0	0	0	NONE	62	TTTAGGATAGGGAAGAGCGGGC	AACAACAACAACGACAACAACGAA
ITPRIPL2_1	162073	NM_001034841	YES	0	2	0	CANCER	62	CGCGGGAGGTTAGTTTTAAGAGC	TAACCCTATTACTCGAACCCCGAAA
ITPRIPL2_2	162073	NM_001034841	YES	0	2	0	CANCER	62	TTTTTTTTCGGAAGAGGAAATTTTC	CAACTTCTAACCCGACCTAACTCG
KCTD12	115207	NM_138444	NO	0	1	0	CANCER	62	TTGGAATTTAAGGGGGCGTATAGC	GCGCTACACTCAAAAACTACAACCG
KIAA1199	57214	NM_018689	NO	0	0	0	NONE	62	AGTAGAGTTTAGCGCGGTGTTATCG	AATCTAAATTCAAACCCTAACCGCG
KLF4	9314	NM_004235	NO	0	0	0	NONE	62	TTTTTCGATTAGAGAGAACGAACGT	AAATCACTCGACGACTCCCGAT
KRT14	3861	NM_000526	NO	2	5	3	GENERAL	62	TTTTATTTAGTTAATTGTTCGTTCGT	GACTAAAACCGCCCCCGAT
KRT18_L	3875	NM_000224	YES	2	5	3	GENERAL	62	TAGTTGAGATTATAGGCGTGTATTATTACGT	GAATCACGAAATCAAAAAATCGAA
KRT18_S	3875	NM_000224	YES	2	5	3	GENERAL	62	TCGTTTTATTTTTTTTATTAATTATCGG	GCCTACATAAACGCTAACCGCG
KRT19	3880	NM_002276	NO	2	5	3	GENERAL	57	TGTTTTTCGTTCGTTTTGTGTTTTC	CATAATTAACTTCTCGTTACCCGCC
KRT7	3855	NM_005556	NO	0	1	0	CANCER	62	TTGGTAGTAGAGAAAGGTGGTTCGC	TAACCTCGAAAACACTCCGCG
KRT81	3887	NM_002281	NO	2	5	3	GENERAL	60	ACTACATCTCGACCTACGAACCG	CGTTGTGGTTGTCGAAGTTTTCG
KRT86	3892	NM_002284	NO	2	5	3	GENERAL	62	TTATAGCGTGTGCGGAGGTTTTC	AAAAACTCTCGTTAACCGACACGAT
L1TD1	54596	NM_019079	NO	2	5	2	GENERAL	62	TTAGTAATTGTTTAGGGCGGAATGC	AATCCGCCTAAACGACTAAAAAACG
LAMA3	3909	NM_198129	NO	2	0	0	LYMPH	62	GTGTTTTCGAGTTTTTTTGCGGAC	ACGACAATACTAACCCCAATACCCG
LAMC2	3918	NM_018891	NO	2	2	1	GENERAL	62	AGGGTTTCGGGGAATTTCGT	ACACAAACCGAACTAAAAAATCGCT
LAT2	7462	NM_032464	NO	0	2	1	EPI	62	GTTTGTTCGGTAGTGCGGC	CAACACCACTAACACTAACGAACGA
LGALS8	3964	NM_201545	NO	0	0	0	NONE	62	CGTTTTAGATATAGAAGGCGGGGC	AAAACGACAAAAATCAATCCTCGTT
LIPG	9388	NM_006033	NO	2	3	0	LYMPH_CANCER	57	GTTGGAGTCGTAGTTGTTTGC	CGAAACTAAAAAAAATTTAAATAAAAACG
LMCD1	29995	NM_014583	NO	1	0	0	LYMPH	62	GGAGGGGGATAGTTTCGCGT	AAAACTCTATACGCAACCAAACGCA
LMTK3	114783	XM_936372	NO	0	0	0	NONE	62	AGTTTTATTTAGGGGAACGTTTCGT	CGATCCATCGAAAACACCGAC
LPXN	9404	NM_004811	NO	2	3	1	GENERAL	62	TGTCGGGAGGTTTTAATTGAGTTAC	TCAAACCAACAATTAACTCGACGCT
LRCH4	4034	NM_002319	NO	0	0	0	NONE	62	GGCGTCGGAGTTTTATTTTTATTGAC	AACGATATCCGAAACCGAACGA
LRRN5	10446	NM_006338	NO	1	2	0	LYMPH_CANCER	62	GTTTGTTTCGGGTATTTGCGAAC	CAAAACCCAACCGATAAAAACGAT
MAFF_1	23764	NM_012323	YES	0	0	0	NONE	62	GTTTTTAGGGGGCGGGGTTATAC	ACCGCGCGAAATTATAAAACGA
MAFF_2	23764	NM_012323	YES	0	0	0	NONE	62	TAGTAGTGTGTATTTCGGAGAGGGC	CCCCGAATAATAAAACTAAAACGAC
MAL	4118	NM_022440	NO	0	0	0	NONE	62	TATTGGGTTTCGCGGAGTTAGC	ATCGAACAAAATAATAAAAACCGAA
MAL2	114569	NM_052886	NO	2	0	0	LYMPH	60	GGGTGCGTATGGAGACGTTCG	AATACGACTATTACAACCGCCAAACG
MAP1LC3A	84557	NM_181509	NO	0	4	0	CANCER	62	GGTTTTATTTTGAGTTCGGGTTGC	GAAAAACGAAACTTCTAAACGCGTC
MAP3K8	1326	NM_005204	NO	0	0	0	NONE	62	CGTTTTCGTTTTAGGTTTTCGATTC	GCCCCTCATTTACCCTCTAAACG
MARVELD3	91862	NM_001017967	NO	2	0	0	LYMPH	62	ATAGGTGAGTGTTCGTTTCGTTTTC	GAATCTTCCATAACCGAATTCCGTA
MFI2	4241	NM_033316	NO	0	1	0	CANCER	62	GTAGGAGGTTGAGGCGAGAGTTTC	GAAATCCACGCCCCTAAAACG
MICAL1	64780	NM_022765	NO	0	1	0	CANCER	62	ATTTAGAGGTTTTAGAGCGGAACGG	TCCAACGAAAACAATCTTAAACCCG
MLLT11	10962	NM_006818	NO	0	0	0	NONE	62	GGGTTTTTCGGGTTAGTTTTGC	GAACCGAACGAATTTCGTAATCG
MLPH	79083	NM_024101	NO	2	1	0	LYMPH_CANCER	62	TAAATTGGTTTGGGGGTCGAGTATTC	CCCTACCAAACAAAAAACGAAACGA
MSLN	10232	NM_013404	NO	2	4	3	GENERAL	62	TTTTTATGGGCGTTGTTAGCGTTAC	GTAAATCCACCGATAACTCTCTATCCG
MSX1	4487	NM_002448	NO	0	0	0	NONE	62	CGGGCGAGTTTTTAGGAGC	GAAACGACGACCAATCAACG
MX1_L	4599	NM_002462	YES	0	0	0	NONE	62	TTTTTAGACGGGTTTGATGAAACGA	GACTCCGAACGCAAAAACGAA
MX1_S	4599	NM_002462	YES	0	3	0	NONE	62	TGGAAATTAGCGAGTAGAAATGAAATC	CGACCCTAATCCTACAAACACGAA
MYL9	10398	NM_006097	NO	2	3	0	LYMPH_CANCER	62	GGTTAAATAAGGTCGGACGGTAGTC	TAAACTCCAAACGAAAACGAAACGT
NBL1_L	4681	NM_182744	YES	0	5	0	CANCER	62	ATAGTACGGATTTGAATCGGGTCGT	CAAACTTACCCCGAAAATAAAACGC
NBL1_S	4681	NM_182744	YES	0	0	0	NONE	62	TATTCGGAGGGAGAGGTCGC	CCAAACAAAACGCGAAAACG
NCCRP1	342897	NM_001001414	NO	2	5	2	GENERAL	60	CACCTAAAAACTACTCCTATTACGACGAC	GTTGTTTTGGGTTTTTGCGTATTTTCG
NEFH	4744	NM_021076	NO	2	5	0	LYMPH_CANCER	60	TAGCGGTTTTTATTCGTGGATACGG	TCGATACTTAAAACGACGCCTACG
NES	10763	NM_006617	NO	2	5	0	LYMPH_CANCER	60	CGAAAAACTCCGAACACAATCCG	GCGTTGGTTAACGAGGGTTCG
NETO2	81831	NM_018092	NO	0	0	0	NONE	62	GGGCGGGTATATGCGTATAGGC	GACGCGAAATCCACTAAAATAACGAA
NFKB2	4791	NM_002502	NO	0	0	0	NONE	62	GTTCGTTGAAAAGTAGCGGGAGTTC	CCGAAAAAAACGAACCTAAAAATAACG
NFKBIA	4792	NM_020529	NO	0	0	0	NONE	62	TCGTAGTAGCGTTCGTAGTTCGTTC	CCTTAACCATCTACTCGTACTCCTCGT
NFS1	9054	NM_021100	NO	0	0	0	NONE	62	TTTACGTTTTTTACGGAAAACGACG	CAAACTCCCGAAAATACTACCCGAC
NMB	4828	NM_021077	NO	2	5	3	GENERAL	62	AGTGGTAAGGTAGGGTTAGGGGAAG	CCAAACAAAAACACCCCCTTTAAAC
NOV	4856	NM_002514	NO	2	4	1	GENERAL	60	AATTGTTATGGTAATTTCGGGGTTCG	TCACGCCCAACACAAATTTTATAACG
NRIP3	56675	NM_020645	NO	2	3	1	GENERAL	62	CGGTCGTAAGGAGATCGATATGC	GTCCAAAAACAACAAATCGACGAA
NTN4	59277	NM_021229	NO	0	0	0	NONE	62	TTGAGGCGATCGGGATTAGC	CGCGCTTAACAACCCGAA
NTSR1	4923	NM_002531	NO	1	1	1	GENERAL	62	GTTTCGTGGAGACGCGTAGAGTC	CAAACCCCCGAAAACAACG
OAS3	4940	NM_006187	NO	0	0	0	NONE	62	ACGAAATTAGAAATTCGAAGGTCGC	CTTCTAACCACGAACCTATCCAACG
OVOL2	58495	NM_021220	NO	2	0	0	LYMPH	62	AGGGTTGGAATAGGTAGTTTCGGTC	AAACTAAACATACGCCCTACAACATAACG
OXTR	5021	NM_000916	NO	1	0	1	LYMPH_HME	62	GTTTTGGGATTAACGTTGGGC	AAAACTACACTATCGCACGAATCCG
PARM1	25849	NM_015393	NO	0	0	0	NONE	62	GTATCGGAGGGTACGTAGTTGACGG	CGAAACGAACGACAAAAAATTTACGA
PARP12	64761	NM_022750	NO	0	3	0	CANCER	62	TTTTGTGAGTCGTTTACGAAGTTCG	CAAAAACCCCTAATACCGCGAT
PARP14	54625	NM_017554	NO	0	0	0	NONE	57	TTTTTGTAGTTCGGCGGAGAGC	TTAATATTCAAATTCTTCGAAAAATCGAA
PARP9	83666	NM_031458	NO	0	0	0	NONE	57	TGAATTTTATTCGGAAGGTGTTC	CTCTAAATCCTCGAACGACGA
PECI	10455	NM_006117	NO	0	2	0	CANCER	62	GTTTTAGAGTCGTTTAAGGGATGGC	ACCGAAACTCCAAACTTACCTCGA
PHLDB2	90102	NM_145753	NO	2	0	0	LYMPH	62	CGGAGTTTATTATTGCGGTTC	TAATACAACCCGTTCCCGAC
PITPNM1	9600	NM_004910	NO	0	0	0	NONE	62	TGTTTTTTTCGTTGTAGGCGG	AATACCGACCCATAACCCCGA
PLA2G4C	8605	NM_003706	NO	0	0	0	NONE	62	CGTAGTTTTTATTCGCGGAGATTTC	CGATACGAAAACTTAAACTCCCTACG
PLAC8	51316	NM_016619	NO	0	3	0	CANCER	62	CGCGGGTTGTTTTTAAGAATTTATC	CTTCTCTACCCGCTCTACACTCGAA
PLAU	5328	NM_002658	NO	1	3	0	LYMPH_CANCER	62	CGTTGTAAGATAGGGGAGGGAGTC	GAAAACAAATAAACCCTAACCCGAA
PLCE1	51196	NM_016341	NO	2	2	0	LYMPH_CANCER	62	TTAGTAGTTAGTTTCGGGGGAGGC	CCCGAATAAAAAACCGCTAACG
PLEKHG4_L	25894	NM_015432	YES	0	0	0	NONE	62	CGGTGTTTTTCGCGTATTTATTTTC	CCACTCCCCGAACCTAACGA
PLEKHG4_S	25894	NM_0011297284	YES	2	5	2	GENERAL	62	GGTAGGAGAGCGAATTCGAGGTATC	CGTAAACCTCTACTCCGTACGCG
PPP1R15A	23645	NM_014330	NO	0	0	0	NONE	62	TTATTGTGTTCGTTGTTTTTATCGG	CCGAATAACTCAAAATATCTCCGAC
PRAME	23532	NM_206953	NO	2	4	3	GENERAL	62	GTAGGGCGGAGTTTTTTGTAGGTTC	AACTTACTCTCTAAAACGCGCGTTC
PRDM1	639	NM_182907	NO	0	2	0	CANCER	62	ATATATGCGAAGAGAGGAAGTTTTCG	CGTAACCAACACCACCTAACCG
PRKCDBP	112464	NM_145040	NO	2	5	2	GENERAL	62	GAGGTTTGGTAGGGTTCGTGC	CTCCGCCTTAACCAACAACTACG
PSAT1	29968	NM_021154	NO	0	4	1	EPI	62	GAGGAGGAGTAATTGTTTCGATTCG	GCCCCATTAACCCGTACTATCG
PSMB9	5698	NM_002800	NO	2	1	1	GENERAL	62	GTTGGAAATTAGTGTTTTAGGCGGC	ATTACCCCGATATAAACTTCTCCCG
PSTPIP2	9050	NM_024430	NO	0	0	0	NONE	62	GGTTTTTTCGTTTTGTGTTATTTGC	GAATCCTAAACCCCGCGAT
PTGR1	22949	NM_012212	NO	0	0	0	NONE	62	GTTTTTTGGAGAGTTTGGAGTCGC	CCTCCCGAATACAAAAAACTACCG
PTGS2	5743	NM_000963	NO	1	5	0	LYMPH_CANCER	62	TATATAGGTGAGTATTTGGCGTCGC	CACGAAATTCTTTCGAACTCTAACG
PTPRR	5801	NM_002849	NO	2	5	1	GENERAL	62	AGTCGTTGTTAAGATTCGGAGAAGC	TAAACGCCCAAAAACCAAAACG
PTRF	284119	NM_012232	NO	2	5	0	LYMPH_CANCER	57	GTTCGGGAGTTGGGGAGTTTATC	AAACAAAAAAAACTCGAACCACGTC
PYCARD	29108	NM_145182	NO	0	5	0	CANCER	62	GAAGCGTTTTTTGTTGGAGGGTAAC	CTCCAACGCATCCAAAATAACG
QPCT	25797	NM_012413	NO	2	5	2	GENERAL	62	CGTTTAGTTTCGGGGTTTGC	CTTCTCCACCCTTAAATCGACTACG
RAB34_L	83871	NM_031934	YES	2	5	2	GENERAL	62	TTGGTTTTTGGTATCGTTAGATGTTGC	ACCTCTATACCCGACTACGCCTTCA
RAB34_S	83871	NM_031934	YES	2	5	2	GENERAL	62	GAATTTTCGGGGATCGTGTTATAGC	TACCATTACAAAACGACCCGAAAAC
RAET1G	353091	NM_001001788	NO	0	0	0	NONE	62	GTGTGTTTTTTTCGAGGGGC	CAACCCGTAAATCACCTAACGACT
RAET1L	154064	NM_130900	NO	1	3	0	LYMPH_CANCER	62	GGTCGTTGAATATTTTTTTGTACGT	GCTCCGACAACTTAATAACCTCGTA
RARRES1	5918	NM_002888	NO	2	4	0	LYMPH_CANCER	62	GAATTTAGGGGTTGCGGGAAAC	GACAAACACGAACTCGAAACGAA
RASD1	51655	NM_016084	NO	0	3	0	CANCER	57	TTTTTTGTTTAATGAAATTGGTCGC	AACGAACCGAAAATAACCATACGAT
RASSF2	9770	NM_170774	NO	0	1	0	CANCER	62	TTGGTTGGATTTGAGTTCGGTTC	CGTAAAATTAAAAAATAAAAACGCCGC
RBBP6	5930	NM_006910	NO	0	0	0	NONE	57	GGCGTTCGTTCGAAGTTAGGTC	AAACAACGACTAAAACTTCTCCGAC
RELB	5971	NM_006509	NO	0	0	0	NONE	62	GGGGTGTAGATTAATGGGCGC	TCTAATAAACGATCGCGAATCGAAC
RFTN1_1	23180	NM_015150	YES	2	5	2	GENERAL	62	TCGATCGTCGGAGGGATAGATATAC	ATACCATACAAAAAAAACGACGCGA
RFTN1_2	23180	NM_015150	YES	2	5	2	GENERAL	60	GCGTCGAAACTAAAACCGAAACG	GTTTGTTTTTCGTCGGAGTTCGC
RHOB	388	NM_004040	NO	0	0	0	NONE	62	GAGAGATTCGGGAGAGAGTTAGGTC	CCGAAAATCGACGACTTTATACGTA
RNF39	80352	NM_025236	NO	2	1	0	LYMPH_CANCER	62	ATAGTAAGTAGTAGGGGCGGTTCGT	GCATCCATAAAAAACCAAAATCTAAACG
RPL29	6159	NM_000992	NO	0	0	0	NONE	62	TTTTTTTTTCGGTTTTAGGCGTTTC	GACAAACACACGATCGATCACC
RRM2	6241	NM_001034	NO	0	0	0	NONE	62	TTGTTTTGGTTGTTCGTTTTGTTTC	AACTCACCGTATTCTCCTTATCGAC
S100A6	6277	NM_014624	NO	0	4	0	CANCER	62	TGCGTTGTGTAAGTTACGGCGTA	CGATACCCCGAAAACCAACTCG
SC4MOL	6307	NM_006745	NO	0	0	0	NONE	57	GGTTAATAACGATAGGACGGGTCGT	CGCCAAATATTCCAACCTCGA
SDC4	6385	NM_002999	NO	0	0	0	NONE	62	GGTTTCGTTTTTATTGGGGAATTTC	CCCATCTTATAAACGACCTACCGAC
SELM	140606	NM_080430	NO	0	0	0	NONE	62	GAGCGTTTATATTTTCGGTCGA	GAAATCCTAACTCCTCCCTAACGTT
SERPINE1	5054	NM_000602	NO	2	5	0	LYMPH_CANCER	62	TTCGGGTTTAAGGTAGAGAATTCGT	ATCGACCCAAAACTACAAATCCGA
SERPINE2	5270	NM_006216	NO	0	0	0	NONE	62	GGGAGATTTACGTGTAGTTGGGTTC	CCGCCAAAAATCCGTATCGTA
SFN	2810	NM_006142	NO	2	4	2	GENERAL	62	GAGGATATGGTAGTTTTTATGAAAGGCGTC	CCGAACCCTCCTCGTTACTTTTCTA
SGK1_1	6446	NM_005627	YES	0	0	0	NONE	62	CGGCGGTGTTTTTTTTATAAGGTC	CGAAAAAACAAAAAAACGTTAACGC
SGK1_2	6446	NM_005627	YES	0	0	0	NONE	62	TTTTTTAAGTCGTTTTTAGGAGCGT	AAAAAAAATACGCCTCCCCG
SGPP2	130367	XM_938742	NO	2	1	0	LYMPH_CANCER	62	GTTTTCGGGGTCGAGTATTTTTTC	ACCTACCCATAATTACCTCCGACG
SH2B3	10019	NM_005475	NO	0	1	0	CANCER	62	GGTCGTTGTAAAGTTTTTTCGGC	CGAAAAATAACCAACGCCTCAT
SIVA1	10572	NM_021709	NO	0	0	0	NONE	62	GGAGTTGCGTAGTTTTCGGTTTC	CGACTCAACTCCCTCTAACTCACG
SLC15A3	51296	NM_016582	NO	1	5	3	GENERAL	62	TTTAGTTCGGAGTTAGGATGTTCGC	GCCGAAAAAAACGACGCG
SOD2	6648	NM_001024466	NO	0	0	0	NONE	62	TTCGCGTTTTTTTAAGGTTCGC	CTACCGCTAATACCGCCGATCTACT
SOX15_1	6665	NM_006942	YES	2	4	3	GENERAL	62	CGTTTGGTAGTTGTCGGAATTTC	CGATCCCTCTCCCCGACCCGCA
SOX15_2	6665	NM_006942	YES	2	4	3	GENERAL	62	GCGTTGGGAGTTTCGCGGTTTTC	GCCATCTAACGACGCTAAACGA
SOX15_3	6665	NM_006942	YES	2	4	3	GENERAL	62	TTTCGGCGTAAGGTTAAGAGTTC	GATTAAATAATCGCGTACCCCG
SOX18	54345	NM_018419	NO	1	1	0	LYMPH_CANCER	62	CGGTTTGAGAAGAAAGGGAGTTTTC	GAACGAACGCCCAAATATAACGAC
SPARC	6678	NM_003118	NO	0	4	1	EPI	57	TTTTAGATTGTTCGGAGAGCGC	TAAAAAAAACCGTAATAAAACCGAA
SPHK1_L	8877	NM_021972	YES	0	0	0	NONE	62	GCGGGGCGTTTTAGTTTTTTAGAC	AAATAAACGACCCTACCCAATCGAT
SPHK1_S	8877	NM_021972	YES	0	0	0	NONE	62	AGTTACGGGGTTTTGATTTATTCGTC	CCGCCGTATAACTAAACCTACAATCC
SPOCK2	9806	NM_014767	NO	2	5	3	GENERAL	62	TTAGGTTTTGTTTTGCGTAACGC	TTCGTTAAAACAAAAACCGTATAACAACTAA
SPTBN1_L	6711	NM_178313	YES	0	0	0	NONE	62	AGCGCGTAGTTTTGCGTAGTAGC	GCTCCTCGACGACCGAAC
SPTBN1_S	6711	NM_178313	YES	0	1	0	CANCER	62	GGCGAGTGGTTTTTGATAAAATTATAAATC	TCCTAAACATACCACGATTACCGAA
SQSTM1_L	8878	NM_003900	YES	0	0	0	NONE	62	TATTAGGATAGCGAGAGGAAGGCGT	GCACCCGAAAAAATAAAACTCCG
SQSTM1_S	8878	NM_003900	YES	0	0	0	NONE	62	CGTTCGTTATGGCGTCGTTTATC	GACTTCCGCCTCAAACTCGAA
ST6GAL1	6480	NM_173216	NO	0	1	0	CANCER	62	CGTTAATAAAGGGAGTCGATATCGATC	CCTACTCACTCGCTACACTCTCGA
STC2	8614	NM_003714	NO	0	0	0	NONE	62	AGTAGTCGGGGGTTATTTCGATTC	ACATTTTCTCAAAACGCTACTCGC
STOM	2040	NM_004099	NO	0	0	0	NONE	62	TTTAGGGTATTTTCGGCGGTTTC	AATCCCGTATATACCGCTTCTCGAC
STX11	8676	NM_003764	NO	0	0	0	NONE	62	GTCGCGTTTTAGCGTTGTTATTTC	GAAACTAAATTCCTCCACGACCG
TACSTD2	4070	NM_002353	NO	2	0	0	LYMPH	57	GTTTGTAGTAGGAGGTCGCGTC	TCCGAACCGAAAACCGAA
TAF13	6884	NM_005645	NO	0	0	0	NONE	62	TAATTTTTTCGGGATTATAGGGAGGC	CGATAATACTTTCCGACCTAACGACG
TAP1	6890	NM_000593	NO	0	0	0	NONE	62	ATTTAGTGAGTAGGCGGTCGTTTTC	ACGAAACTCTCGAAAAATCCCA
TDRD6	221400	NM_001010870	NO	2	5	3	GENERAL	62	GGTGTTTTTCGTGGACGTGTATTTC	CCTAAATTTCCCGACTCAACCG
TDRD9	122402	NM_153046	NO	2	5	3	GENERAL	62	AGATTCGGTAGTTGGGGGATGTC	CCGTCTTACCGATAATAAACCAATCG
TFCP2L1	29842	NM_014553	NO	0	1	0	CANCER	57	TAGAGTTTTTTGGTTTGGTCGTTTC	CTAACTAACTCCCGCGCGTA
TGFBI	7045	NM_000358	NO	2	1	1	GENERAL	57	GTGTTTAGGGTAGTTAGGGGCGTAC	ACCAAATTAAATAAACTACGAACGAA
TGM2	7052	NM_004613	NO	2	5	2	GENERAL	62	GTCGTATTTGGAGGGTTTCGTC	ACGATAACTCTAATACTCACCCTCGAC
TMBIM1	64114	NM_022152	NO	0	3	0	CANCER	62	GGATAGATTTTTGCGTTTTTTGGC	AAACGAAACGTTCCTAACCTCGAA
TMCO1	54499	NM_019026	NO	0	0	0	NONE	57	AAATTTATCGGGTAAAGTTCGTCGTC	TAATAATCAAACCGAATCTCGCGAA
TMEM30B	161291	NM_001017970	NO	2	2	2	GENERAL	62	AAATTTTTGTTGGAGGTCGGAGC	CCTCTCCTAAATAAATAACGACCCCG
TNC	3371	NM_002160	NO	0	0	0	NONE	62	TTTATTAATAGTTATTCGGGGTCGG	AAACGCACTCACTCCTAACTCTCGA
TNFAIP3	7128	NM_006290	NO	0	0	0	NONE	62	GGGTTCGGAGAGGTAATCGTC	GAAACAAACGACACGAAAAAACG
TNFRSF21	27242	NM_014452	NO	0	0	0	NONE	62	TTCGGGTGATATTATAAAGGGTCGG	CGCTACCCAAACTAATCGACGAA
TNFRSF6B_L	8771	NM_032945	YES	2	5	2	GENERAL	62	GTGTCGGGTTTGATTGAAGTTTTTC	ACCGACCGATCAAATCTATACACGT
TNFRSF6B_S	8771	NM_032945	YES	2	5	2	GENERAL	62	TATTTATTTATTTTTGGCGGGACGT	GATAAACACGAACCACACGTCGTA
TOM1L2	146691	NM_144678	NO	0	0	0	NONE	62	TAACGATTAATAGGAGGCGGGTTTC	CCACTCTCTAAAACGCCGAACTTAA
TP53INP1	58476	NM_033285	YES	0	0	0	NONE	62	ATAATTTTTCGTAGGGCGGTTTC	CCTTTTATTATTATACAACGCTCGCA
TP53INP2	58476	NM_021202	YES	0	0	0	NONE	62	TTGTTTGAACGTTTTAATTTGTGTCGT	GATCGCTCCGAACTACTAAACTCG
TPM2	7169	NM_213674	NO	2	5	0	LYMPH_CANCER	62	CGGGGTTTTTTTAGTCGATC	AACAAAAACACGACCCGA
TRPM4	54795	NM_017636	NO	0	0	0	NONE	62	GTTTTGGCGTTTTTAAGATTTTTCGT	GACACCACCATACTACCGCGAC
TUBA1	7277	NM_006000	NO	0	0	0	NONE	57	GTATTTTCGCGGAGGTTTTC	CTAAAATTAAAAATCGCGATTCG
TYMP	1890	NM_001953	NO	2	4	1	GENERAL	62	GCGAGGGTAGCGTTTTAAGTAGGTAC	TATCTATATCGCCCTCGTCCGTATC
UCHL1	7345	NM_004181	NO	0	4	2	EPI	57	GGTGATTTTACGAAATCGGTTAC	GAATCTATACTACCCGCGCC
UPP1	7378	NM_003364	NO	0	0	0	NONE	60	CGGGGTTATCGTTAGATAGATAGATC	GAAAAAAACCGAACTAAAAACGAC
VAMP5	10791	NM_006634	NO	2	4	3	GENERAL	62	GTCGTTGTGGTTTATCGTTTTCGA	GCTCCCGACTTCTCTACCTACGAA
VCAN	1462	NM_004385	NO	0	5	0	CANCER	62	TTAGGCGTGCGGACGTAATAGTC	CCCAAACGAATCACATAAAAAACGTA
WDR66	144406	NM_144668	NO	0	3	2	EPI	62	TTAGCGATCGGTAGGAGGTACGTC	AAACCCTAAAACGACAAAACAAAACG
ZC3H12A	80149	NM_025079	NO	1	4	1	GENERAL	62	AGTAGGAAGGGGCGAGGTAGTTTC	GACGACGTCTCCATAAAACCGAA
ZC3HAV1	56829	NM_024625	NO	0	0	0	NONE	62	TTTAAAGAAGGTTCGCGGAGTTC	CGCGAACAAATCTACTAATAACCG
ZNF22	7570	NM_006963	NO	0	3	0	CANCER	62	GTGGGTTCGGGATTATAGAGGGTC	GAAAATAAAAACCTCGCCGCG
ZNF296	162979	NM_145288	NO	0	1	0	CANCER	62	GTTTCGTTTTGGTAGGCGGAGTTAC	GAACGAAAAACGCACGAACG
ZNF512	84450	NM_032434	NO	0	3	0	CANCER	62	AGTTTATATTCGGGAGAGGAGAGCG	AACTCACAACGAATACAACACCGAA
ZSWIM4	65249	NM_023072	NO	1	0	0	LYMPH	62	AGGTTTGGATACGGGTTTGGC	TAAAACTACTTCAACCGCCGCTTTAA
