# Supplementary material for: Identification of Breast Cancer DNA Methylation Markers Optimized for Fine-Needle Aspiration Samples
Source: Oxford University Press journal article supplement (doi:10.1158/1055-9965.epi-13-0208), 2013-10-02
Supplement: 10559965epi130208-sup-supplementary_table_2.xlsx [file 10559965epi130208-sup-supplementary_table_2.xlsx]

## Sheet: Sheet1
Supplemental Table 2: Phase 2 Qualitative MSP Screen in Primary Cancers and Benign RP-FNA Samples. (N) in header is number of samples tested. The table shows the proportion of samples positive for methylation. CA is primary breast cancer FNAs, B9CA is benign RP-FNA samples from patients with primary breast cancer, and B9_U is benign RP-FNAs from unaffected women never diagnosied with breast cance…
Symbol	Entrez	Accession	CA (15)	B9CA (5)	B9_U (10)	Group	Delta CA-B9	Annealing Temp	PCR cycles	[MgCl2] mM
CYP24A1	1591	NM_000782	0.8	0.2	0	CANCER_HME	0.733333	59	40	1.5
HLA-B	3106	NM_005514	0.866667	0.2	0.2	CANCER_HME	0.666667	62	40	2
PSAT1	29968	NM_021154	0.733333	0	0.1	CANCER	0.666667	62	40	1.5
LAT2	7462	NM_022040	0.866667	0.4	0.3	CANCER_HME	0.533333	62	40	2
FBLN2	2199	NM_001998	0.533333	0	0	CANCER	0.533333	62	40	2
NBL1	4681	NM_005380	0.533333	0	0	CANCER	0.533333	62	40	2
VCAN	1462	NM_004385	0.466667	0	0	CANCER	0.466667	62	40	1.5
AKR1B1	231	NM_001628	0.733333	0.4	0.2	CANCER_HME	0.466667	62	40	2
CPNE8	144402	NM_153634	0.666667	0.2	0.2	CANCER_HME	0.466667	62	40	1.5
ADM	133	NM_001124	0.4	0	0	CANCER	0.4	55	40	2
FLNC	2318	NM_001458	0.4	0	0	CANCER	0.4	62	44	2
IRF7	3665	NM_004029	0.466667	0	0.1	CANCER	0.4	62	40	2
ARTN	9048	NM_003976	0.466667	0	0.1	CANCER	0.4	62	40	1.5
UCHL1	7345	NM_004181	0.533333	0.4	0	CANCER_HME	0.4	62	40	2
CLDN1	9076	NM_021101	0.6	0.4	0.1	CANCER_HME	0.4	62	40	2
HBA2	3040	NM_000517	0.333333	0	0	CANCER	0.333333	62	40	2
CXCL14	9547	NM_004887	0.533333	0.2	0.2	CANCER_HME	0.333333	60	40	1.5
CD14	929	NM_001040021	0.266667	0	0	CANCER	0.266667	62	44	2
CKB	1152	NM_001823	0.266667	0	0	CANCER	0.266667	62	40	2
GSTP1	2950	NM_000852	0.333333	0	0.1	CANCER	0.266667	62	40	1.5
GNE	10020	NM_005476	0.266667	0	0	CANCER	0.266667	62	44	2
C1QTNF1	114897	NM_198594	0.266667	0	0	CANCER	0.266667	55	40	2
HOXB5	3215	NM_002147	0.2	0	0	CANCER	0.2	59	40	2
MX1	4599	NM_002462	0.2	0	0	CANCER	0.2	62	40	2
PECI	10455	NM_006117	0.266667	0.2	0	CANCER	0.2	62	40	2
PYCARD	29108	NM_013258	0.2	0	0	CANCER	0.2	62	40	1.5
CYB5R2	51700	NM_016229	0.2	0	0	CANCER	0.2	59	40	2
C7orf57	136288	XM_059832	0.2	0	0	CANCER	0.2	62	40	1.5
GPX1	2876	NM_201397	0.4	0	0.3	CANCER_HME	0.2	62	40	2
BIRC3	330	NM_001165	0.333333	0.2	0.1	CANCER_HME	0.2	55	40	1.5
CCNA1	8900	NM_003914	0.333333	0	0.2	CANCER_HME	0.2	59	40	2
WDR66	144406	NM_144668	0.333333	0.2	0.1	CANCER_HME	0.2	62	44	1.5
GBP4	115361	NM_052941	1	0.6	0.9	CANCER_HME	0.2	62	44	1.5
ZNF512	84450	NM_032434	0.2	0.2	0	CANCER	0.133333	62	40	1.5
RASD1	51655	NM_016084	0.133333	0	0	CANCER	0.133333	62	40	1.5
TMBIM1	64114	NM_022152	0.133333	0	0	CANCER	0.133333	62	40	2
S100A6	6277	NM_014624	0.266667	0.2	0.1	CANCER_HME	0.133333	62	44	2
SPARC	6678	NM_003118	1	1	0.8	CANCER_HME	0.133333	55	40	2
CRIP1	1396	NM_001311	0.133333	0.2	0	CANCER	0.0666667	62	40	1.5
FOSL1	8061	NM_005438	0.0666667	0	0	CANCER	0.0666667	62	40	2
CCNDBP1	23582	NM_037370	0.0666667	0	0	CANCER	0.0666667	62	40	2
HES2	54626	NM_019089	0.0666667	0	0	CANCER	0.0666667	55	40	2
MAP1LC3A	84557	NM_181509	0.0666667	0	0	CANCER	0.0666667	62	44	1.5
ITPRIPL2	162073	NM_001034841	0.0666667	0	0	CANCER	0.0666667	62	40	1.5
ABCA1	19	NM_005502	0	0	0	NONE	0	62	44	2
FBXO2	26232	NM_012168	0	0	0	NONE	0	62	40	2
PLAC8	51316	NM_016619	0	0	0	NONE	0	62	40	1.5
FXYD5	53827	NM_014164	0	0	0	NONE	0	62	40	1.5
ZNF22	7570	NM_006963	0.07	0	0.2	CANCER_HME	-0.0633333	62	44	2
